# **Functional characterization of peroxisome biogenic proteins Pex5 and Pex7 of *Drosophila***

Francesca Di Cara, Richard A. Rachubinski and Andrew J. Simmonds

Department of Cell Biology, Faculty of Medicine and Dentistry, University of Alberta,  
Edmonton, Alberta, Canada, T6G 2H7 [andrew.simmonds@ualberta.ca](mailto:andrew.simmonds@ualberta.ca)

## ABSTRACT

Peroxisomes are ubiquitous membrane-enclosed organelles involved in lipid processing and reactive oxygen detoxification. Mutations in human peroxisome biogenesis genes (*Peroxin*, *PEX*) cause progressive developmental disabilities and, in severe cases, early death. PEX5 and PEX7 are receptors that recognize different peroxisomal targeting signals called PTS1 and PTS2, respectively, and traffic proteins to the peroxisomal matrix. We characterized mutants of *Drosophila melanogaster Pex5* and *Pex7* and found that adult animals are affected in lipid processing. Moreover, *Pex5* mutants exhibited severe developmental defects in the embryonic nervous system and muscle, similar to what is observed in humans with *Pex5* mutations, while *Pex7* fly mutants were weakly affected in brain development, suggesting different roles for *Pex7* in fly and human. Of note, although no PTS2-containing protein has been identified in *Drosophila*, *Pex7* from *Drosophila* can function as a *bona fide* PTS2 receptor because it can rescue targeting of the PTS2-containing protein Thiolase to peroxisomes in *PEX7* mutant human fibroblasts.

## INTRODUCTION

Peroxisomes have long been known to be involved in a variety of important biochemical functions, most notably lipid metabolism and the detoxification of reactive species (Bowers, 1998; Deduve, 1965; Nguyen et al., 2008; Wanders and Waterham, 2006). Recent evidence has shown peroxisomes to have important roles in development, immune signaling and viral maturation. Peroxisome biogenesis genes (*Peroxin*, *PEX*) are for the most part conserved across the breadth of eukaryotes (Platta and Erdmann, 2007; Schrader and Fahimi, 2006). Thirteen *PEX* genes are required for peroxisome biogenesis in humans, and mutations in these genes cause the peroxisome biogenesis disorders (PBDs), which manifest as heterogeneous syndromes with varied developmental defects (Braverman et al., 2013). *PEX5* and *PEX7* act as receptors that recognize *cis*-acting signals called peroxisome targeting signals (PTS) in soluble peroxisomal proteins to traffic them from the cytosol to the peroxisome matrix (Smith and Aitchison, 2013) (Ito et al., 2007; Klein et al., 2001; Purdue et al., 1997). *PEX5* and *PEX7* homologues are found across the eukaryota, including kinetoplastids, yeasts, plants and mammals (Kanzawa et al., 2012; Kragler et al., 1998; Lazarow, 2006; Matsumura et al., 2000; McCollum et al., 1993; Purdue et al., 1997; Rehling et al., 1996; Woodward and Bartel, 2005). *PEX5* recognizes the C-terminal PTS1 with the canonical sequence Ser-Lys-Leu (SKL), while *PEX7* recognizes an N-terminal nonapeptide PTS2 with the consensus sequence (R/K)(L/V/I)X<sub>5</sub>(H/Q)(L/A) (Ito et al., 2007; McCollum et al., 1993; Rehling et al., 1996; Shimozawa et al., 1999). Mutation of *PEX5* gives rise to Zellweger syndrome, while mutation of *PEX7* gives rise to Rhizomelic Chondrodysplasia Punctata Type 1 (RCDP1) (Purdue et al., 1997).

Mutation of *Drosophila Pex* genes is linked to a range of phenotypes, including lethality (*Pex1*, *Pex3*, *Pex19*) and male sterility (*Pex16*) (Beard and Holtzman, 1987; Bulow et al., 2018; Chen et al., 2010; Faust et al., 2014; Mast et al., 2011; Nakayama et al., 2011). In *Drosophila* S2 cells, knock down of *Pex5* transcript reduces targeting of PTS1-containing proteins to peroxisomes function, while depletion or overexpression of *Pex7* transcript led to smaller or larger peroxisomes, respectively, than normal (Baron et al., 2016). However, the actual function of *Drosophila Pex7* remains unclear, as no *bona fide* peroxisomal PTS2-containing protein has been identified in *Drosophila*; fly homologues of peroxisomal proteins trafficked by the PTS2/PEX7 import pathway, e.g. peroxisomal Thiolase, use the PTS1/Pex5 pathway in *Drosophila* (Baron et al., 2016; Faust et al., 2012).

Here we show that *Drosophila Pex5* mutants exhibited severe developmental defects in the embryonic nervous system and muscle, similar to what is observed in Zellweger syndrome patients with *PEX5* mutations. *Pex7* fly mutants exhibited minor defects in brain development. We also show that *Drosophila Pex7* can function as a *bona fide* PTS2 receptor because it can rescue targeting of the PTS2-containing protein Thiolase to peroxisomes in *PEX7* mutant human fibroblasts.

## RESULTS AND DISCUSSION

### *Drosophila Pex5* is required for development

The *Pex5*<sup>MI06050</sup> mutation was caused by a MiMIC insertion disrupting the coding region (Venken et al., 2011). *Pex5* is on the X chromosome and *Pex5*<sup>MI06050</sup> mutants were lethal when homozygous or as hemizygous males with only 20% of embryos hatching (Figure 1A-C). A further 15% of *Pex5*<sup>MI06050</sup>/*Pex5*<sup>MI06050</sup> mutants died as larvae with only 5%

pupating (Figures 1A1-3, C). The 2% of pupae survived died at eclosion (Figure 1A1-4, 1C). *Pex5<sup>MI06050</sup>/Pex5<sup>MI06050</sup>* embryos had 35% of *Pex5* mRNA compared to control (Figure 1B). Maternally provided *Pex5* mRNA likely caused the phenotypic variability observed. Finally, strains where the *Pex5<sup>MI06050</sup>* MiMIC element was excised precisely were viable supporting that the phenotypes were due to *Pex5* disruption.

Human *PEX5* mutations cause central nervous system (CNS), peripheral nervous system (PNS) and musculature defects (Braverman et al., 2013; Steinberg et al., 2006). Thus, we assayed CNS and PNS organization in *Pex5<sup>MI06050</sup>* mutant embryos compared to age-matched controls. In *Pex5<sup>MI06050</sup>/Pex5<sup>MI06050</sup>* embryos, both the PNS and ventral nerve cord (VNC) were disorganized (Figure 2A). PDB patients often show axonal demyelination (Braverman et al., 2013) and while *Drosophila* neurons are unmyelinated, wrapping glia play an analogous role (Freeman and Doherty, 2006; Matzat et al., 2015). Glial cells were disorganized in *Pex5<sup>MI06050</sup>/Pex5<sup>MI06050</sup>* embryos compared to controls (Figure 2A). Finally, the developing longitudinal and oblique musculature in late-stage *Pex5<sup>MI06050</sup>/Pex5<sup>MI06050</sup>* embryos was also disorganized (Figure 2B).

### ***Drosophila Pex5* is required for peroxisome biogenesis**

To determine if the *Pex5<sup>MI06050</sup>* mutation affects PTS1-mediated peroxisome import we analyzed the localization of PTS1/SKL containing proteins in third instar larvae midgut cells (Szilard et al., 1995). A punctate signal, corresponding to peroxisomes with active PTS1 import, was present only in controls. Large SKL-positive aggregates were observed in *Pex5<sup>MI06050</sup>/Pex5<sup>MI06050</sup>* midgut cells indicating lack of PTS1 import (Figure 2C). To examine the systemic effect of *Pex5<sup>MI06050</sup>* mutation on peroxisome function, we profiled

the spectrum of fatty acids. *Pex5<sup>MI06050</sup>/Pex5<sup>MI06050</sup>* embryos accumulate VLCFAs (C<sub>22</sub> and C<sub>24</sub>) and relatively lower levels of C<sub>14</sub>, C<sub>16</sub>, C<sub>18</sub> and C<sub>20</sub> compared to controls (Figure 2D).

### ***Drosophila Pex7* is required for neuronal development**

*Pex7<sup>MI4471</sup>* is caused by MiMIC insertion into the *Pex7* coding region (Venken et al., 2011). Unlike *Pex5<sup>MI06050</sup>*, *Pex7<sup>MI4471</sup>/Pex7<sup>MI4471</sup>* mutants were viable with only 5% arresting before pupal stage. Arrested pupae were the same size as control but developmental abnormalities were observed (Figure 1A1, 2, 5). QRT-PCR analysis showed *Pex7<sup>MI4471</sup>/Pex7<sup>MI4471</sup>* embryos had only 10% *Pex7* mRNA relative to controls (Figure 1D). As a symptom of *PEX7*-linked RDCP is defects neurogenesis (Braverman et al., 2013; Steinberg et al., 2006), we analyzed the brain morphology of *Pex7<sup>MI4471</sup>/Pex7<sup>MI4471</sup>* third instar larvae. Compared to wild type, *Pex7<sup>MI4471</sup>/Pex7<sup>MI4471</sup>* larvae were larger (Figure S1A), but their brain volume was smaller (Figure 3A). Although *Pex7<sup>MI4471</sup>/Pex7<sup>MI4471</sup>* animals were slightly larger than control at the same stage but the mutation did not appear to affect the developmental timing as most of the animals reached the adult stage at the same time as control animals (Figure 1A1,2, 5). This phenotype unusual in that small brain / enlarged body size is usually associated with developmental arrest (Colombani et al., 2005; Mirth et al., 2005).

Reduced brain size could be due either to reduced proliferation or excess cell death (apoptosis) (Shklyar et al., 2014). The number of phospho-Ser10-histone 3 (PH3) marked mitotic cells (Wei et al.; 1999) was similar in *Pex7<sup>MI4471</sup>/Pex7<sup>MI4471</sup>* brains and controls (Figure S1B). *Pex7<sup>MI4471</sup>/Pex7<sup>MI4471</sup>* brain extracts had elevated Active Caspase3 (CM1) levels compared to control (Figure 3B). Also, there were more CM1 positive cells within developing *Pex7<sup>MI4471</sup>/Pex7<sup>MI4471</sup>* brains compared to controls (Figure 3A). Accumulation

of TUNEL positive cells in the developing brain was also seen in *Pex7<sup>MI4471</sup>/Pex7<sup>MI4471</sup>* and *Pex5<sup>MI06050</sup>/Pex5<sup>MI06050</sup>* embryos (Figure 3D, E).

Despite having altered brain morphology, *Pex7<sup>MI4471</sup>/Pex7<sup>MI4471</sup>* mutants are viable. Thus, we functionally assayed neural and muscular function by analyzing the ability of adult flies to exhibit a negative geotaxis response (Madabattula et al., 2015). This climbing assay is used commonly to assay the effects of CNS neurodegeneration in flies (Feany and Bender, 2000). Control flies were more successful in the climbing assay than *Pex7<sup>MI4471</sup>/Pex7<sup>MI4471</sup>* flies (Figure S1B). Notably, even at the end of the assay (120sec), many *Pex7<sup>MI4471</sup>/Pex7<sup>MI4471</sup>* flies had not completed the task (Figure 3C, S1B).

### ***Drosophila* Pex7 has a role in peroxisome fatty acid processing**

Lack of *Drosophila* PTS2 import calls into question if *Pex7<sup>MI4471</sup>/Pex7<sup>MI4471</sup>* associated defects are linked to peroxisome dysfunction. Non-esterified fatty acids (NEFAs) accumulate in flies with impaired peroxisomes (Bulow et al., 2018). Thus, we measured the relative concentration of circulating NEFAs and observed accumulation in *Pex7<sup>MI4471</sup>/Pex7<sup>MI4471</sup>* larvae compared to control (Figure S1D).

### ***Drosophila* Pex7 can functionally substitute for human PEX7**

In human cells, Thiolase is targeted to peroxisomes via PTS2/PEX7 (Braverman et al., 1997). To determine if *Drosophila* Pex7 retained a similar functional activity, we assayed Thiolase import in human fibroblasts from a RCDP patient with a mutation in *PEX7* (Braverman et al., 1997; Purdue et al., 1997). Transfection with a human *PEX7* cDNA restored Thiolase import to peroxisomes (Figure 4, S3). Transfection with a *Drosophila* Pex7 cDNA also rescued Thiolase import indicating *Drosophila* Pex7 is competent to mediate PTS2 import (Figure 4, S3).

## **The role of *Drosophila* Pex7 is divergent**

Given the previously observed localization of Pex7 to peroxisomes, and the effect on peroxisome size (Baron et al., 2016; Faust et al., 2012; Mast et al., 2011), and effects on lipid processing and brain development we observe in *Pex7<sup>M14471</sup>/Pex7<sup>M14471</sup>* mutants, *Pex7* clearly has a role in peroxisome biogenesis or function. The lack of a canonical PTS2 trafficking pathway in flies, calls into question the mode of action. *Drosophila* *Pex7* homologues of known yeast and human PTS2 targeted proteins have a PTS1 signal (Baron et al., 2016; Faust et al., 2012). It is likely that the canonical PTS2 pathway is not active in *Drosophila*, as S2 cells cannot import a canonical PTS2-mCherry reporter into peroxisomes while mammalian cells can (Faust et al., 2012). On the other hand, comparison of the amino acid sequence of *Drosophila melanogaster Pex7* to *Saccharomyces cerevisiae*, *Arabidopsis thaliana*, *Danio rerio* and *Homo sapiens* homologs (Figure S2) suggests conservation. *Caenorhabditis elegans* does not have a PTS2 pathway but does not have a *Pex7* homologue either (Motley et al., 2000). It is possible *Drosophila* has divergent PTS2 signal. Thus, to determine *Drosophila* does have a divergent PTS2 signal or *Pex7* plays a PTS2-independent peroxisomal function, additional studies are needed.

## **MATERIALS AND METHODS**

### **Cell culture**

Human fibroblasts were cultured in Dulbecco's modified Eagle's medium (ThermoFisher) supplemented with 10% (FBS), 50U penicillin/ml and 50µg streptomycin sulfate/ml.

### **Fly husbandry, egg collection and survival assays**



$y^l Mi\{y^{+mDint2}=MIC\}Pex5^{MI06050} w^*/FM7h$ ) and  $y^l w^*; Mi\{y^{+mDint2}=MIC\}Pex7^{MI14471}$  mutant lines and FM7(GFP) Df(1)JA27/FM7c, P $\{w^{+mC}=GAL4-Kr.C\}DC1$ , P $\{w^{+mC}=UAS-GFP.S65T\}DC5$ ,  $sn^+$  strains were obtained from Bloomington Drosophila Stock Center (BDSC).  $w^{1118}$  was used as a control in all experiments. *Drosophila* were maintained at 25°C on standard BDSC cornmeal medium.  $Pex5^{MI06050}$  mutants balanced over FM7(GFP) were allowed to lay eggs on apple juice agar plates for two days. On the third day, embryos were collected every 2h. GFP-negative embryos were incubated on apple juice agar plates at 25°C. After 24h hatched larvae were transferred to standard cornmeal medium and surviving animals were counted at the same time each day.

### **Geotaxis (climbing) assay**

This assay was performed as described previously (Madabattula et al., 2015) using 20 flies (7 days old) and a 250mL glass graduated cylinder (ThermoFisher), sealed with wax film to prevent escape. Assays were conducted in ambient light at 22°C and performed at the same time each day.

### **Lipid analysis**

One thousand first instar (L1) larvae (equivalent to 1 mg of protein extract) were homogenized in 1ml PBS buffer and sonicated for 5min (BioRuptor) at low power. Lipids were extracted using chloroform:MeOH, 2:1 as described previously (Folch et al., 1957). 5µg of C17 dissolved in chloroform was used as an internal control. Isolates were centrifuged at 3400g and the chloroform phase containing the lipid fraction passed through a sodium sulfate column (GE Bioscience). The eluate was dried under inert gas (N<sub>2</sub>) and resuspended in 100µl µl of HPLC-grade hexane. 10µl was injected into an Agilent 6890 Gas Chromatograph with Flame-Ionization Detector. VLCFA concentration was

normalized to the relative amount of protein determined using a Qubit II fluorimeter (ThermoFisher). Non-esterified fatty acids were analysed as per (Bulow et al., 2018).

### **QRTPCR analysis**

Samples were rinsed twice with PBS, and total RNA extracted using the RNeasy-Micro Kit (Qiagen). 0.5–1μg of RNA was reverse-transcribed using an iScript cDNA Synthesis kit (Biorad), QPCR was performed (Realplex, Eppendorf) using KAPASYBR Green PCR master mix (KAPA Biosystems). Samples were normalized to *RpL23* based on the  $\Delta\Delta CT$  method. A Student's t-test was used to calculate significance of differences in gene expression between averaged sample pairs. QRTPCR primer sequences used were:

*RpL23*, 5'-GACAACACCGGAGCCAAGAACC, 5'-  
GTTTGCGCTGCCGAATAACCAC

*Pex5*, 5'-AAATGCGAAGACATGGAACC, 5'-TGTAACGCACACGGATGAAG

*Pex7*, 5'-TCGAAATAGCCAGGCCATCAAG, 5'AAGGAACCGAAGACAAGGACTC

All QRTPCR data shown here are based on 3 biological samples each tested in triplicate.

### **Protein analysis**

50μl of cold Ephrussi–Beadle Ringer's solution supplemented with 10mM EDTA, 10mM DTT, 1x Complete protease inhibitor and 1x PhosStop phosphatase inhibitor (Roche) was added to  $3 \times 10^6$  pelleted cells. 25μl of 70°C 3X SDS-PAGE Buffer (Biorad) containing 10mM DTT was added to the homogenate and incubated at 100°C for 10 min. Samples were resolved by SDS-PAGE on 10% acrylamide gels and transferred onto nitrocellulose membranes (BioRad). Membranes were blocked in 5% skim milk powder in TBSTw (Tris-buffered saline (150mM NaCl, 20mM Tris pH7.5, 0.05% Tween-20) for 1h and incubated for 16h with primary antibody in TBSTw. After washing three times 5min with TBSTw,

membranes were incubated with HRP-conjugated secondary antibody (1:10,000 BioRad) for 1h at 24°C. Membranes were washed as above and HRP detected by enhanced chemiluminescence (Amersham). Primary antibodies were: rabbit anti-Thiolase (Bodnar and Rachubinski, 1990) mouse anti-Tubulin (Sigma-Aldrich 1:1000).

### **Human *PEX7* and *Drosophila Pex7* cDNA cloning and transfection**

The open reading frame of human *PEX7* cDNA (Braverman et al., 1997) was cloned into pENTR/D (ThermoFisher) using hPex7-Forward (5'-CACCATGAGTGCGGTGTGCGGTGG) and hPex7-Reverse (5'-GGTCAAGCAGGAATAGTAAGACAAG) primers. The *Drosophila Pex7* cDNA clone was described previously (Baron et al., 2016). Both were transferred into pT-Rex-DEST30 vector using LR Clonase (ThermoFisher). These were transiently transfected into immortalized human fibroblasts using the Amaxa Human Dermal Fibroblast Nucleofector Kit (Lonza).

### **Microscopy**

Human fibroblasts were fixed for 30 min in 4% paraformaldehyde in phosphate buffered saline (PBS), rinsed twice in PBST (PBS+0.1% TritonX-100) and blocked for 1h in 5% NGS (Sigma) before incubation for 16h at 4°C with primary antibodies. Following 4 washes in PBST, each were incubated in secondary antibody for 16h at 4°C. After 4 washes in PBST, coverslips were mounted using Prolong-Gold (ThermoFisher). Images were captured using a C9100 camera (Hamamatsu) at 130µm vertical spacing using a 100X oil immersion objective (NA=1.4) on a Zeiss AxioObserverM1 microscope coupled to an ERS spinning disk confocal (PerkinElmer). Primary antibodies included: anti-mouse PMP70 (Sigma-Aldrich) (Imanaka et al., 2000); Activated Caspase3 (559565, BD Pharmagen),

anti-phosphohistone H3 (Upstate Biotechnology), rabbit anti-SKL (Szilard et al., 1995) and anti-rat Thiolase (Bodnar and Rachubinski, 1990). Secondary antibodies were: AlexaFluor568 donkey anti-mouse, AlexaFluor488 donkey anti-rat or AlexaFluor647 donkey anti-rabbit (Abcam, 1:1000).

Embryos were collected every 16h at 18°C and processed as reported previously (Parsons and Foley, 2013). Antibodies to Futch (22C10) raised by Seymour Benzer, California Institute of Technology, Even-skipped (2B8) and Repo (8D12) raised by Corey Goodman, University of California, were from the Developmental Studies Hybridoma Bank. Anti-Myosin II was from Abcam (ab51098). All primary antibodies were diluted 1:20, and AlexaFluor568 donkey anti-mouse was the secondary antibody (1:1000, Abcam). Embryo TUNEL staining was performed as described previously (Parsons and Foley, 2013).

## REFERENCES

- Baron, M.N., Klinger, C.M., Rachubinski, R.A., and Simmonds, A.J. (2016). A Systematic Cell-Based Analysis of Localization of Predicted Drosophila Peroxisomal Proteins. *Traffic 17*, 536-553.
- Baroy, T., Koster, J., Stromme, P., Ebberink, M.S., Misceo, D., Ferdinandusse, S., Holmgren, A., Hughes, T., Merckoll, E., Westvik, J., *et al.* (2015). A novel type of rhizomelic chondrodysplasia punctata, RCDP5, is caused by loss of the PEX5 long isoform. *Hum Mol Genet 24*, 5845-5854.
- Beard, M.E., and Holtzman, E. (1987). Peroxisomes in wild-type and rosy mutant *Drosophila melanogaster*. *Proc Natl Acad Sci U S A 84*, 7433-7437.
- Bodnar, A.G., and Rachubinski, R.A. (1990). Cloning and sequence determination of cDNA encoding a second rat liver peroxisomal 3-ketoacyl-CoA thiolase. *Gene 91*, 193-199.
- Bowers, W.E. (1998). Christian de Duve and the discovery of lysosomes and peroxisomes. *Trends Cell Biol 8*, 330-333.
- Braverman, N., Steel, G., Obie, C., Moser, A., Moser, H., Gould, S.J., and Valle, D. (1997). Human PEX7 encodes the peroxisomal PTS2 receptor and is responsible for rhizomelic chondrodysplasia punctata. *Nat Genet 15*, 369-376.
- Braverman, N.E., D'Agostino, M.D., and Maclean, G.E. (2013). Peroxisome biogenesis disorders: Biological, clinical and pathophysiological perspectives. *Dev Disabil Res Rev 17*, 187-196.
- Bulow, M.H., Wingen, C., Senyilmaz, D., Gosejacob, D., Sociale, M., Bauer, R., Schulze, H., Sandhoff, K., Teleman, A.A., Hoch, M., *et al.* (2018). Unbalanced lipolysis

- results in lipotoxicity and mitochondrial damage in peroxisome-deficient Pex19 mutants. *Mol Biol Cell* 29, 396-407.
- Chen, H., Liu, Z., and Huang, X. (2010). *Drosophila* models of peroxisomal biogenesis disorder: peroxins are required for spermatogenesis and very-long-chain fatty acid metabolism. *Hum Mol Genet* 19, 494-505.
- Colombani, J., Bianchini, L., Layalle, S., Pondeville, E., Dauphin-Villemant, C., Antoniewski, C., Carre, C., Noselli, S., and Leopold, P. (2005). Antagonistic actions of ecdysone and insulins determine final size in *Drosophila*. *Science* 310, 667-670.
- Deduve, C. (1965). Functions of Microbodies (Peroxisomes). *Journal of Cell Biology* 27, A25-&.
- Facciotti, F., Ramanjaneyulu, G.S., Lepore, M., Sansano, S., Cavallari, M., Kistowska, M., Forss-Petter, S., Ni, G., Colone, A., Singhal, A., *et al.* (2012). Peroxisome-derived lipids are self antigens that stimulate invariant natural killer T cells in the thymus. *Nat Immunol* 13, 474-480.
- Faust, J.E., Manisundaram, A., Ivanova, P.T., Milne, S.B., Summerville, J.B., Brown, H.A., Wangler, M., Stern, M., and McNew, J.A. (2014). Peroxisomes are required for lipid metabolism and muscle function in *Drosophila melanogaster*. *PLoS One* 9, e100213.
- Faust, J.E., Verma, A., Peng, C., and McNew, J.A. (2012). An inventory of peroxisomal proteins and pathways in *Drosophila melanogaster*. *Traffic* 13, 1378-1392.
- Feany, M.B., and Bender, W.W. (2000). A *Drosophila* model of Parkinson's disease. *Nature* 404, 394-398.

- Folch, J., Lees, M., and Sloane Stanley, G.H. (1957). A simple method for the isolation and purification of total lipides from animal tissues. *J Biol Chem* 226, 497-509.
- Freeman, M.R., and Doherty, J. (2006). Glial cell biology in *Drosophila* and vertebrates. *Trends Neurosci* 29, 82-90.
- Imanaka, T., Aihara, K., Suzuki, Y., Yokota, S., and Osumi, T. (2000). The 70-kDa peroxisomal membrane protein (PMP70), an ATP-binding cassette transporter. *Cell Biochem Biophys* 32 *Spring*, 131-138.
- Ito, T., Fujimura, S., Matsufuji, Y., Miyaji, T., Nakagawa, T., and Tomizuka, N. (2007). Molecular characterization of the PEX5 gene encoding peroxisomal targeting signal 1 receptor from the methylotrophic yeast *Pichia methanolica*. *Yeast* 24, 589-597.
- Kanzawa, N., Shimozawa, N., Wanders, R.J., Ikeda, K., Murakami, Y., Waterham, H.R., Mukai, S., Fujita, M., Maeda, Y., Taguchi, R., *et al.* (2012). Defective lipid remodeling of GPI anchors in peroxisomal disorders, Zellweger syndrome, and rhizomelic chondrodysplasia punctata. *J Lipid Res* 53, 653-663.
- Klein, A.T., Barnett, P., Bottger, G., Konings, D., Tabak, H.F., and Distel, B. (2001). Recognition of peroxisomal targeting signal type 1 by the import receptor Pex5p. *J Biol Chem* 276, 15034-15041.
- Kragler, F., Lametschwandtner, G., Christmann, J., Hartig, A., and Harada, J.J. (1998). Identification and analysis of the plant peroxisomal targeting signal 1 receptor NtPEX5. *Proc Natl Acad Sci U S A* 95, 13336-13341.
- Lazarow, P.B. (2006). The import receptor Pex7p and the PTS2 targeting sequence. *Biochim Biophys Acta* 1763, 1599-1604.

- Lepore, M., de Lalla, C., Gundimeda, S.R., Gsellinger, H., Consonni, M., Garavaglia, C., Sansano, S., Piccolo, F., Scelfo, A., Haussinger, D., *et al.* (2014). A novel self-lipid antigen targets human T cells against CD1c(+) leukemias. *J Exp Med* *211*, 1363-1377.
- Madabattula, S.T., Strautman, J.C., Bysice, A.M., O'Sullivan, J.A., Androschuk, A., Rosenfelt, C., Doucet, K., Rouleau, G., and Bolduc, F. (2015). Quantitative Analysis of Climbing Defects in a *Drosophila* Model of Neurodegenerative Disorders. *J Vis Exp*, e52741.
- Mast, F.D., Li, J., Virk, M.K., Hughes, S.C., Simmonds, A.J., and Rachubinski, R.A. (2011). A *Drosophila* model for the Zellweger spectrum of peroxisome biogenesis disorders. *Dis Model Mech* *4*, 659-672.
- Matsumura, T., Otera, H., and Fujiki, Y. (2000). Disruption of the interaction of the longer isoform of Pex5p, Pex5pL, with Pex7p abolishes peroxisome targeting signal type 2 protein import in mammals. Study with a novel Pex5-impaired Chinese hamster ovary cell mutant. *J Biol Chem* *275*, 21715-21721.
- Matzat, T., Sieglitz, F., Kottmeier, R., Babatz, F., Engelen, D., and Klambt, C. (2015). Axonal wrapping in the *Drosophila* PNS is controlled by glia-derived neuregulin homolog Vein. *Development* *142*, 1336-1345.
- McCollum, D., Monosov, E., and Subramani, S. (1993). The pas8 mutant of *Pichia pastoris* exhibits the peroxisomal protein import deficiencies of Zellweger syndrome cells - the PAS8 protein binds to the COOH-terminal tripeptide peroxisomal targeting signal, and is a member of the TPR protein family. *J Cell Biol* *121*, 761-774.



- Mirth, C., Truman, J.W., and Riddiford, L.M. (2005). The role of the prothoracic gland in determining critical weight for metamorphosis in *Drosophila melanogaster*. *Curr Biol* *15*, 1796-1807.
- Motley, A.M., Hetteema, E.H., Ketting, R., Plasterk, R., and Tabak, H.F. (2000). *Caenorhabditis elegans* has a single pathway to target matrix proteins to peroxisomes. *EMBO Rep* *1*, 40-46.
- Nakayama, M., Sato, H., Okuda, T., Fujisawa, N., Kono, N., Arai, H., Suzuki, E., Umeda, M., Ishikawa, H.O., and Matsuno, K. (2011). *Drosophila* carrying *pex3* or *pex16* mutations are models of Zellweger syndrome that reflect its symptoms associated with the absence of peroxisomes. *PLoS One* *6*, e22984.
- Nguyen, S.D., Baes, M., and Van Veldhoven, P.P. (2008). Degradation of very long chain dicarboxylic polyunsaturated fatty acids in mouse hepatocytes, a peroxisomal process. *Biochim Biophys Acta* *1781*, 400-405.
- Parsons, B., and Foley, E. (2013). The *Drosophila* platelet-derived growth factor and vascular endothelial growth factor-receptor related (Pvr) protein ligands Pvf2 and Pvf3 control hemocyte viability and invasive migration. *J Biol Chem* *288*, 20173-20183.
- Platta, H.W., and Erdmann, R. (2007). Peroxisomal dynamics. *Trends Cell Biol* *17*, 474-484.
- Purdue, P.E., Yang, X., and Lazarow, P.B. (1998). Pex18p and Pex21p, a novel pair of related peroxins essential for peroxisomal targeting by the PTS2 pathway. *J Cell Biol* *143*, 1859-1869.

- Purdue, P.E., Zhang, J.W., Skoneczny, M., and Lazarow, P.B. (1997). Rhizomelic chondrodysplasia punctata is caused by deficiency of human PEX7, a homologue of the yeast PTS2 receptor. *Nat Genet* *15*, 381-384.
- Rehling, P., Marzioch, M., Niesen, F., Wittke, E., Veenhuis, M., and Kunau, W.H. (1996). The import receptor for the peroxisomal targeting signal 2 (PTS2) in *Saccharomyces cerevisiae* is encoded by the PAS7 gene. *EMBO J* *15*, 2901-2913.
- Schrader, M., and Fahimi, H.D. (2006). Peroxisomes and oxidative stress. *Biochim Biophys Acta* *1763*, 1755-1766.
- Shimozawa, N., Zhang, Z., Suzuki, Y., Imamura, A., Tsukamoto, T., Osumi, T., Fujiki, Y., Orii, T., Barth, P.G., Wanders, R.J., *et al.* (1999). Functional heterogeneity of C-terminal peroxisome targeting signal 1 in PEX5-defective patients. *Biochem Biophys Res Commun* *262*, 504-508.
- Shklyar, B., Sellman, Y., Shklover, J., Mishnaevski, K., Levy-Adam, F., and Kurant, E. (2014). Developmental regulation of glial cell phagocytic function during *Drosophila* embryogenesis. *Dev Biol* *393*, 255-269.
- Smith, J.J., and Aitchison, J.D. (2013). Peroxisomes take shape. *Nat Rev Mol Cell Biol* *14*, 803-817.
- Steinberg, S.J., Dodt, G., Raymond, G.V., Braverman, N.E., Moser, A.B., and Moser, H.W. (2006). Peroxisome biogenesis disorders. *Biochim Biophys Acta* *1763*, 1733-1748.
- Szilard, R.K., Titorenko, V.I., Veenhuis, M., and Rachubinski, R.A. (1995). Pay32p of the yeast *Yarrowia lipolytica* is an intraperoxisomal component of the matrix protein translocation machinery. *J Cell Biol* *131*, 1453-1469.

Venken, K.J., Schulze, K.L., Haelterman, N.A., Pan, H., He, Y., Evans-Holm, M., Carlson, J.W., Levis, R.W., Spradling, A.C., Hoskins, R.A., *et al.* (2011). MiMIC: a highly versatile transposon insertion resource for engineering *Drosophila melanogaster* genes. *Nat Methods* 8, 737-743.

Wanders, R.J., and Waterham, H.R. (2006). Biochemistry of mammalian peroxisomes revisited. *Annu Rev Biochem* 75, 295-332.

Woodward, A.W., and Bartel, B. (2005). The Arabidopsis peroxisomal targeting signal type 2 receptor PEX7 is necessary for peroxisome function and dependent on PEX5. *Mol Biol Cell* 16, 573-583.

## FIGURE LEGENDS

**Fig. 1. *Pex5* and *Pex7* mutants present developmental defects.** (A) 1. Control pupa 7 days after egg laying (AEL). 2. Control adults eclosed at day 9 AEL. 3. Most *Pex5*<sup>MI06050</sup>/*Pex5*<sup>MI06050</sup> mutants arrest at pseudo-pupa stage (day 11 AEL) 4. Some *Pex5*<sup>MI06050</sup>/*Pex5*<sup>MI06050</sup> mutants die during eclosion (day 10 AEL). 5. Some *Pex7*<sup>MI4471</sup>/*Pex7*<sup>MI4471</sup> mutants arrest at pupa stage (day 11 AEL). Scale bar=1mm. (B) QRTPCR confirms reduction in the amount of *Pex5* mRNA in *Pex5*<sup>MI06050</sup>/*Pex5*<sup>MI06050</sup> embryos, relative to controls. Values are averages of 4 independent experiments  $\pm$  SD. Significance was determined using Student's *t*-test; \*\*\*  $p < 0.001$ . (C) Most *Pex5*<sup>MI06050</sup>/*Pex5*<sup>MI06050</sup> mutants die at embryo stage and none eclose as adults. Values are averages of 4 independent experiments  $\pm$  SD. N=200 embryos were analyzed for each genotype. Significance was determined using Student's *t*-test; \*\*\*  $p < 0.001$ . (D) QRTPCR confirms reduction of *Pex7* mRNA in *Pex7*<sup>MI4471</sup>/*Pex7*<sup>MI4471</sup> embryos, relative to control. Values are averages of 4 independent experiments  $\pm$  SD. Significance was determined using Student's *t*-test; \*\*\*  $p < 0.001$ .

**Fig. 2. The *Pex5*<sup>MI06050</sup> mutation affects NS, PNS and muscle development.** (A) The repeated segmental pattern of neuron of the CNS and PNS (marked by anti-Futsch), CNS axons (marked by anti-Even-skipped) and glia cells (except midline glia, marked by anti-Repo) in control embryos (stage 15). This pattern is severely disrupted in *Pex5*<sup>MI06050</sup>/*Pex5*<sup>MI06050</sup> embryos. Scale bar=10 $\mu$ m. (B) The repeated segmental pattern of developing muscles marked by Anti-Myosin II in control embryos is disrupted in *Pex5*<sup>MI06050</sup>/*Pex5*<sup>MI06050</sup> embryos (stage 15). Scale bar=10 $\mu$ m. (C) Mature peroxisomes (punctate anti-SKL signal, red) are observed in the larval midgut. In *Pex5*<sup>MI06050</sup>/*Pex5*<sup>MI06050</sup>

mutants, diffuse SKL aggregates indicate PTS1 import was impaired. DAPI labelled nuclei are in grey. The boxed region in the top panel is shown magnified in the lower panel. Scale bar=10  $\mu\text{m}$  (D) *Pex5<sup>MI06050</sup>/Pex5<sup>MI060</sup>* mutants have lower long chain fatty acid levels (C<sub>14</sub>, C<sub>16</sub> and C<sub>18</sub>) and accumulate VLCFAs (C<sub>20</sub>, C<sub>22</sub> and C<sub>24</sub>) compared to controls. Values are averages of 4 independent experiments  $\pm$  SD. N=1000 larvae per sample per each genotype were used in each replicate (4000 total). Significance was determined using Student's *t*-test; \*\*\*  $p < 0.001$ ; \*\*  $p < 0.01$ .

**Fig. 3. *Pex7* mutation causes defects in CNS development.** (A) *Pex7<sup>MI4471</sup>/Pex7<sup>MI4471</sup>* larvae that arrest between second and third instar had smaller brains than control. The number of apoptotic cells (marked by activated Caspase3, CM1) was higher in *Pex7<sup>MI4471</sup>/Pex7<sup>MI447</sup>* brains. Scale bar=10  $\mu\text{m}$ . (B) Total CM1 levels were higher *Pex7<sup>MI4471</sup>/Pex7<sup>MI447</sup>* second and third instar larval brains. Values represent averages of 4 independent experiments  $\pm$  SD. Significance was determined using Student's *t*-test; \*\*\*  $p < 0.001$ . (C) *Pex7<sup>MI4471</sup>/Pex7<sup>MI4471</sup>* show reduced performance in a climbing assay, testing coordinated locomotion, than control. Values represent averages of 12 independent experiments  $\pm$  SD. Significance was determined using Student's *t*-test; \*  $p < 0.05$ . (D) TUNEL positive cells were detected around the embryonic CNS in *Pex7<sup>MI4471</sup>/Pex7<sup>MI447</sup>* embryos compared to control. (E) *Pex5<sup>MI06050</sup>/Pex5<sup>MI06050</sup>* embryos also had elevated numbers of TUNEL positive cells in the CNS. Images are representative of 4 independent experiments. N=20 per experiment/genotype. Scale bar=10 $\mu\text{m}$ .

**Fig. 4. *Drosophila Pex7* can facilitate PTS2 import in human cells.** In wild type human fibroblasts, anti-Thiolase marks punctate cytoplasmic spots co-localizing with a peroxisome membrane marker antiPMP70. *PEX7* mutant fibroblasts (*PEX7<sup>null</sup>*) do not have

punctate Thiolase signal indicating lack of import but PMP70 puncta remain, indicating peroxisomes are present. Transfection of *PEX7*<sup>null</sup> cells with *PEX7* cDNA restores Thiolase import to peroxisomes. Expression of a *Drosophila Pex7* cDNA in *PEX7* null human fibroblasts also restored Thiolase import to peroxisomes. Scale bar=10µm.

## SUPPLEMENTARY FIGURE LEGENDS

**Fig. S1. Pex7 mutant show neural defects.** (A) Age matched *Pex7*<sup>M14471</sup>/*Pex7*<sup>M14471</sup> homozygous larvae are larger than control larvae at the L2-L3 molt. (B) Brains from *Pex7*<sup>M14471</sup>/*Pex7*<sup>M14471</sup> larvae exhibit comparable numbers of PH3 positive dividing cells to control flies. Scale bar=1µm (C) The percentage of *Pex7*<sup>M14471</sup>/*Pex7*<sup>M14471</sup> flies having passed the threshold line in the climbing assay represented every 10sec is less than control. Significance was determined using Kolmogorov-Smirnov test to compare the distributions of the mutant group to the control. N=12 per time point; \* p < 0.05. (D) Amounts of NEFAs in larvae from control and *Pex7*<sup>M14471</sup>/*Pex7*<sup>M14471</sup> mutant L3 larvae. Values represent averages of 3 independent experiments ± SD. Significance was determined using Student's *t*-test; \* p < 0.05.

**Fig. S2. Sequence alignment of Pex7 protein homologues.** Sequence alignment of human (HsPex7p, CAG46851.1), zebrafish (DrPex7p, AAI64338.1), plant (AtPex7p, OAP16388.1), yeast (ScPex7p, KZV12380.1) and fruit fly (DmPex7p, NP\_001137914.1). Amino acid sequences were aligned with use of the Kalign program (<https://www.ebi.ac.uk/Tools/msa/kalign>). Residues that are identical (blue) or similar (yellow) to residues in *Drosophila Pex7* are shaded. Similarity rules: G = A = S; A = V; V = I = L = M; I = L = M = F = Y = W; K = R = H; D = E = Q = N; and S = T = Q = N. Dashes represent gaps. Sequence accession numbers are given between brackets.

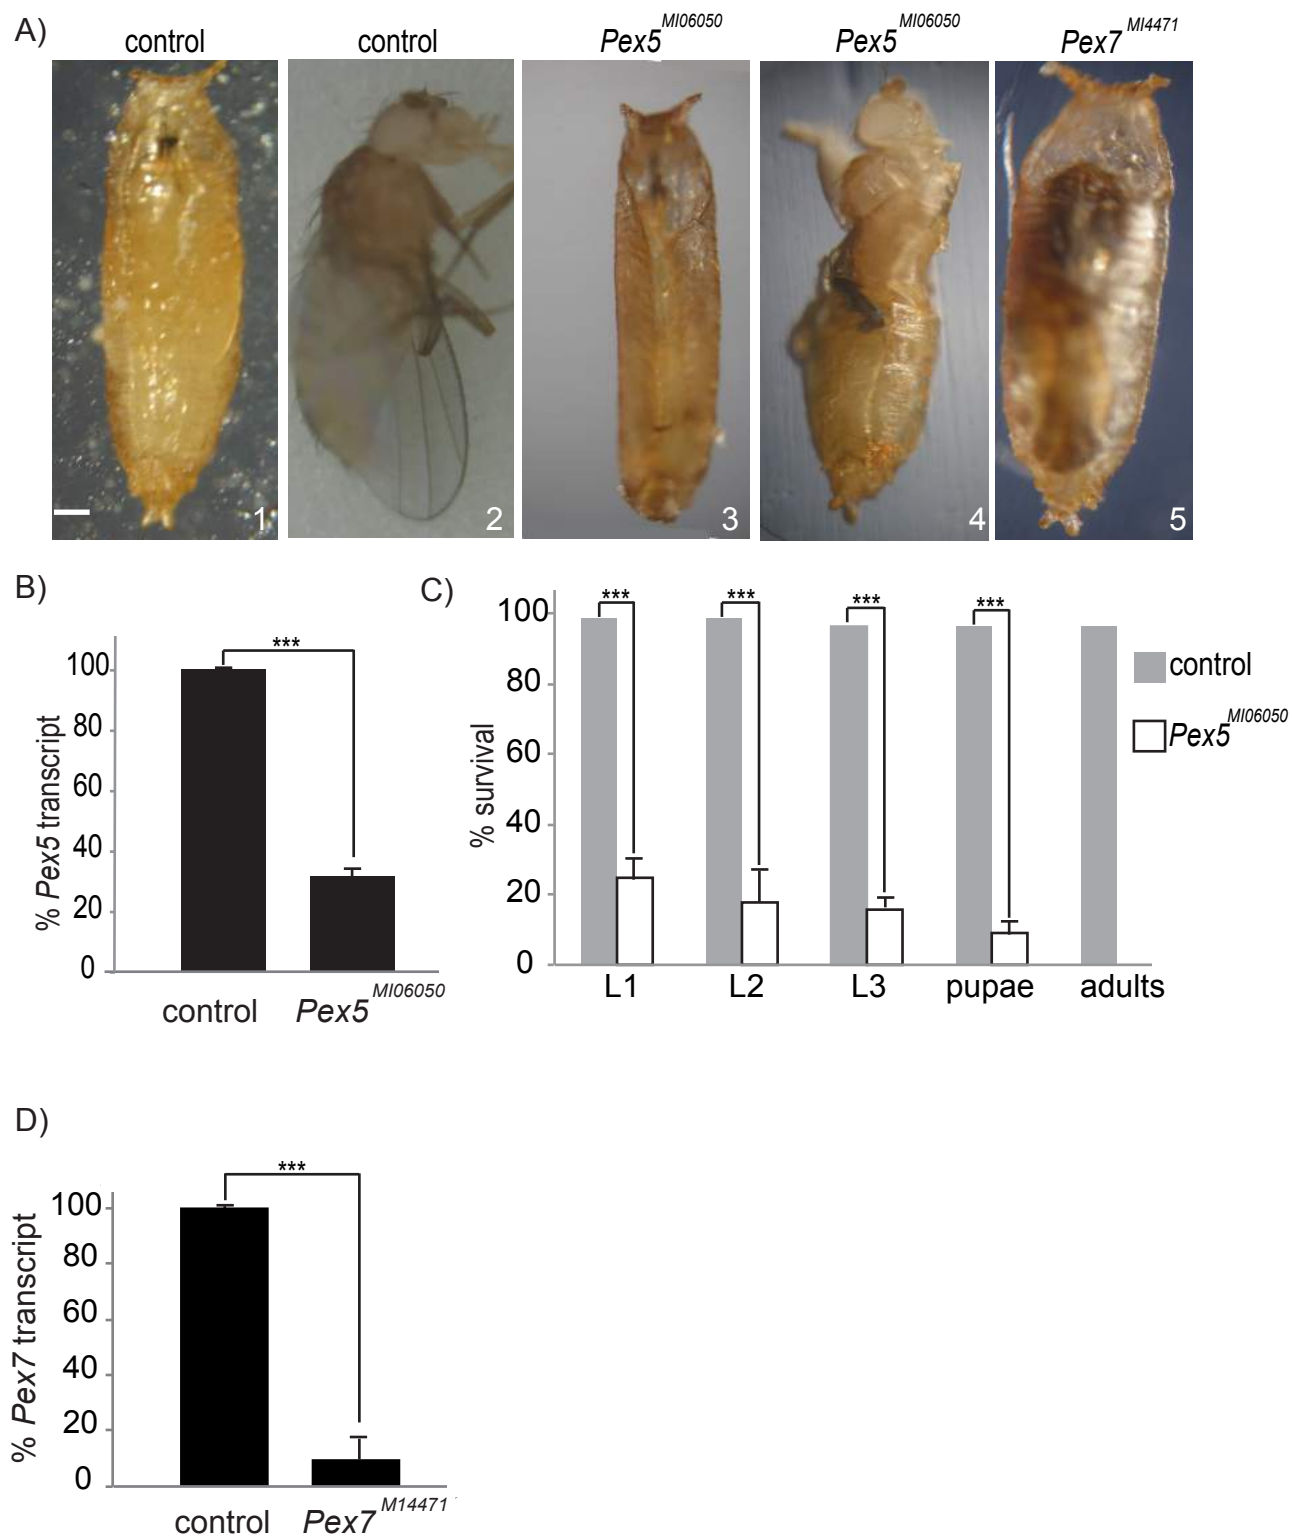

Figure 1

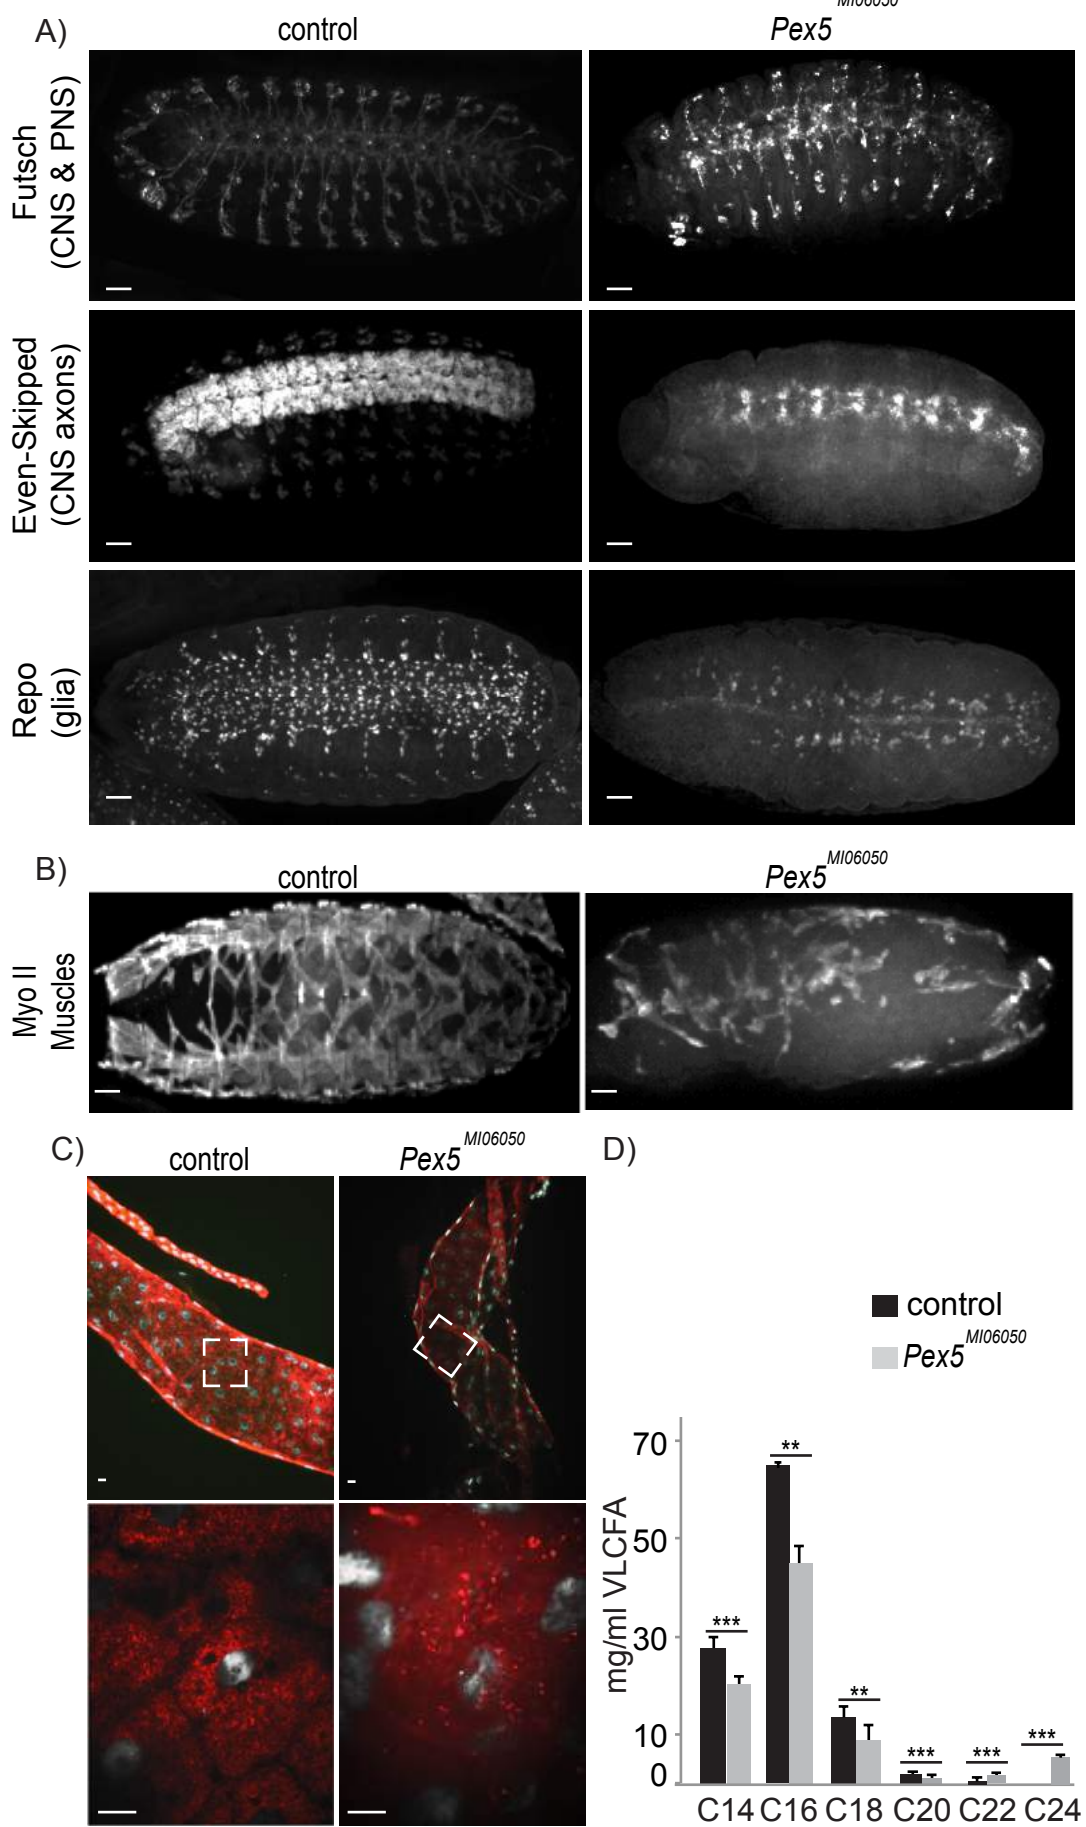

Figure 2



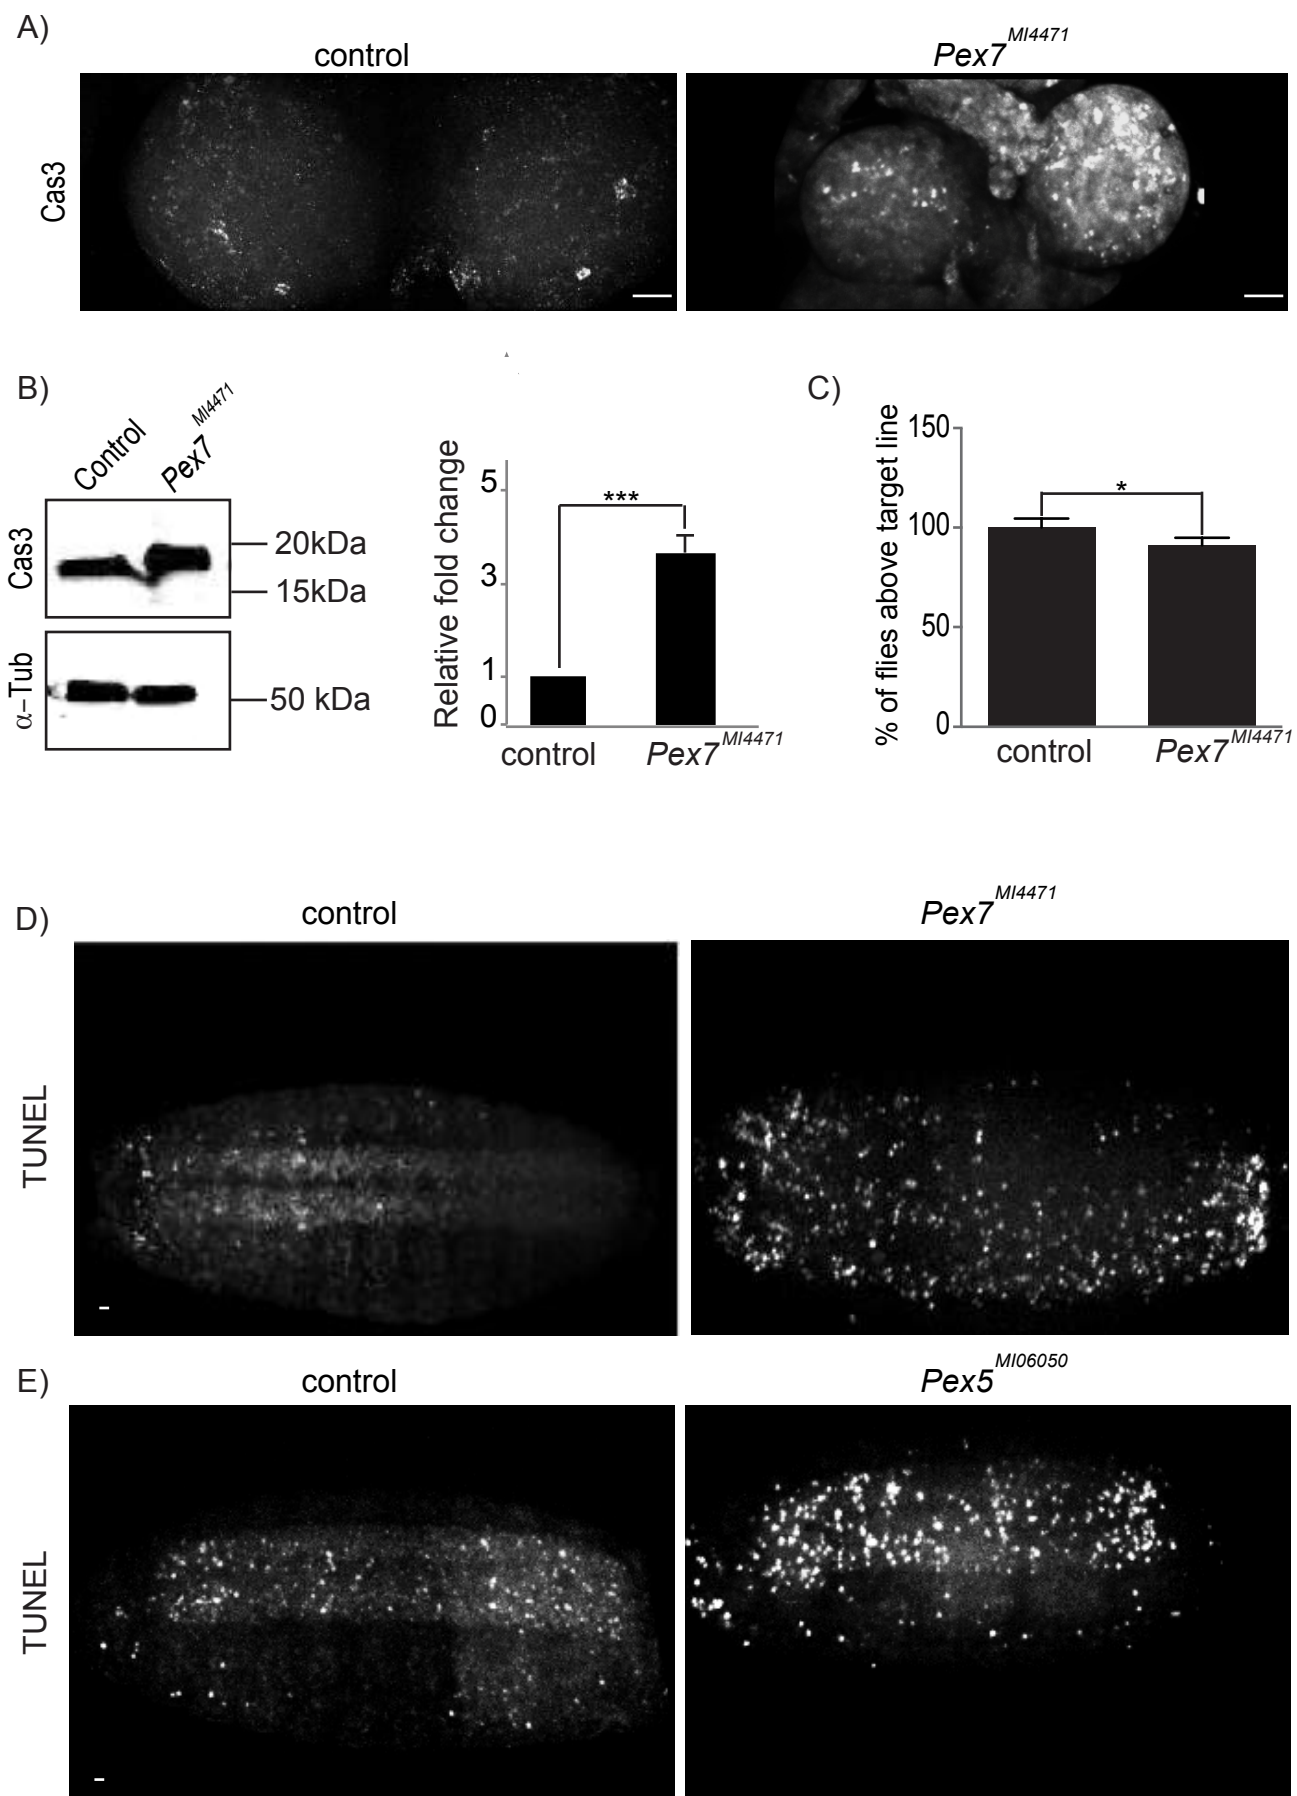

Figure 3

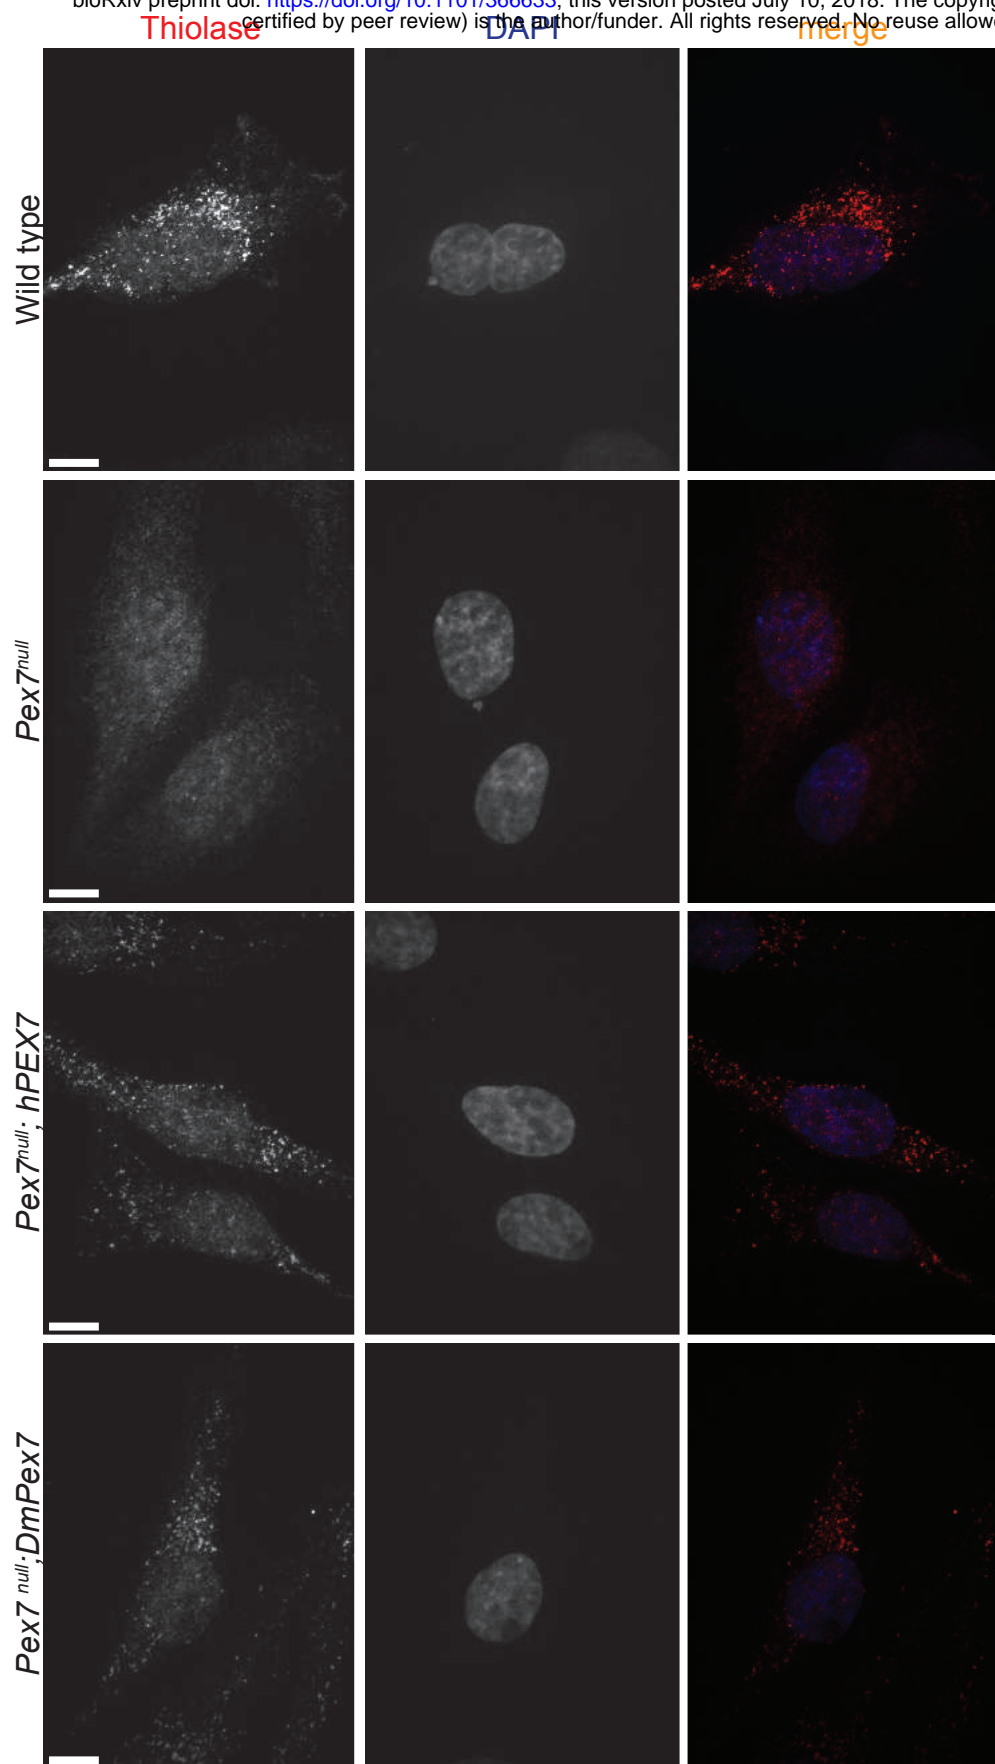

Figure 4

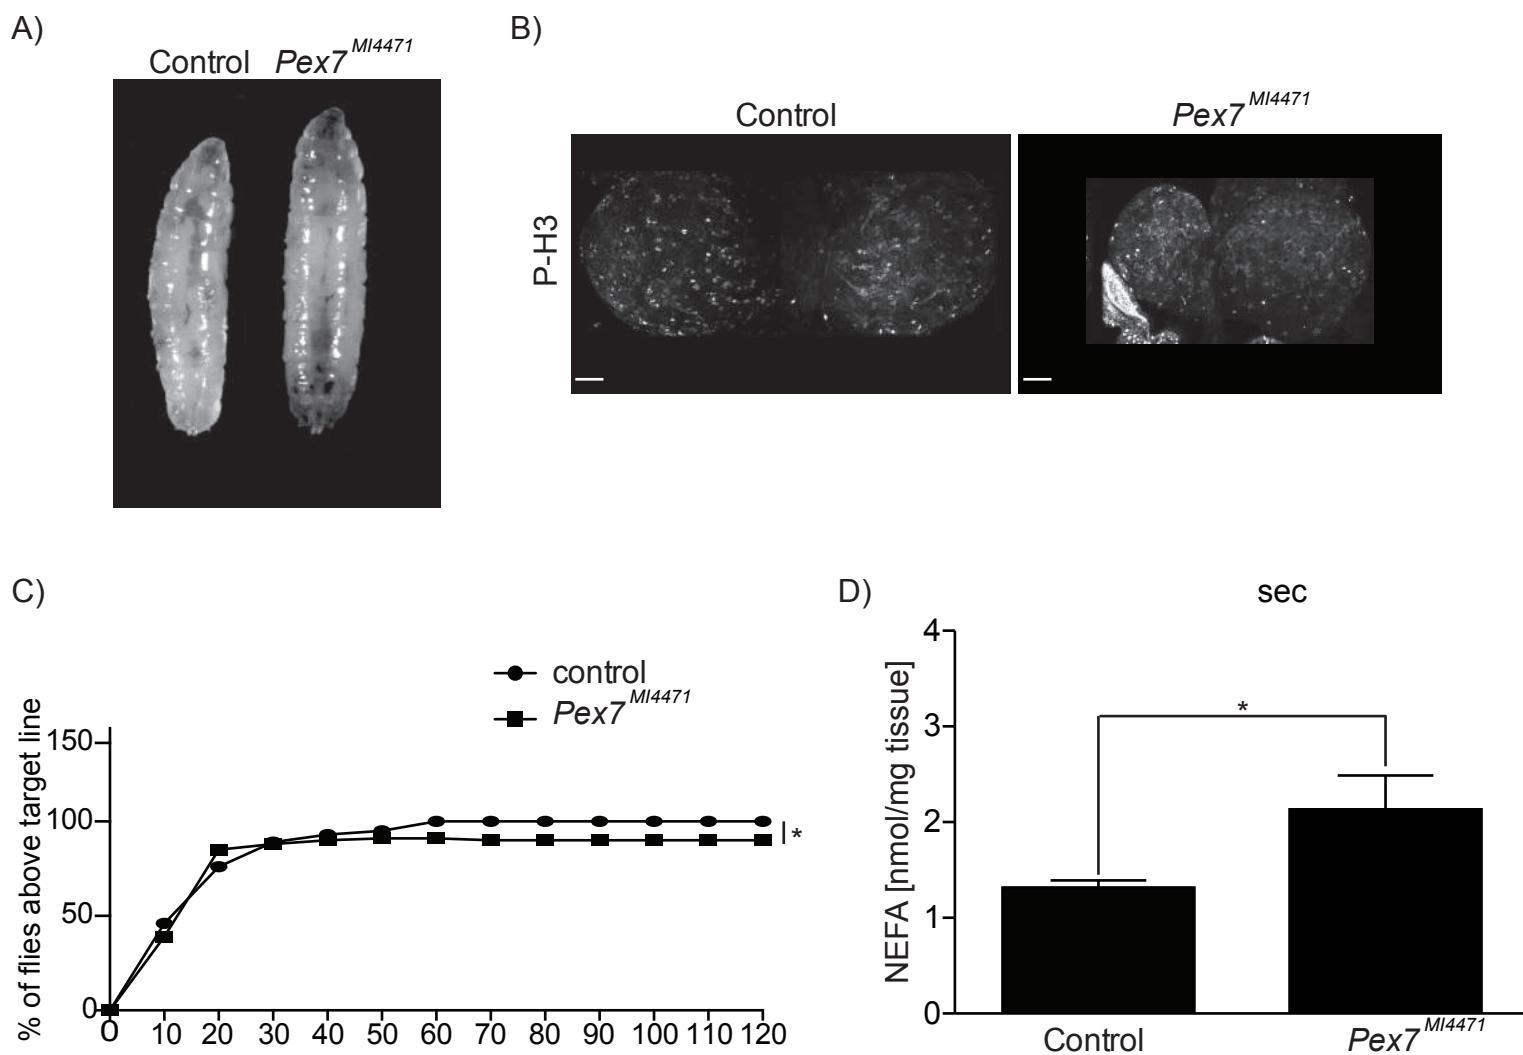

```
HsPex7p 1 MSAVCGGAARMLRTPGRHGYAAEFSPYLPGRLLACATAQHYGIAGCGTLLILD--PDE---
DrPex7p 1 -----MKSFKSPGRHGYAVEISPFLPSTMACASSQCYGIAGCGTLFVLE--QRE---
AtPex7p 1 -----MPVFKAP-FNGYSVKFSPFYESRLAVATAQNFILGNGRIHVLELAPGA---
ScPex7p 1 -----MLRYHMQGFSGYGVQYSPFFDNRLAVAAGSNFGLVGNKGLFILEI-DRS---
DmPex7p 1 MQ-----TQTHTTDRHGYSLRFSPFEANYLLLLATSQLYGLAGGGSFLLE--QNSNTN

HsPex7p 56 -----AGLRLFRSFDWNDGLFDVTWSENNEHVLITCSGDGSLQLW-----DTA--
DrPex7p 48 -----TDVSLVKSFDWNDGLFDVTWSENNEHVLVTGGGDGSLQIW-----DTA--
AtPex7p 49 -----PGVTESVSYDTADAVYDVCWSESHDSVLIAAIGDGSVKIY-----DTALP
ScPex7p 49 -----GRIVEVNSFLTQDCLFDLAWNESHENQVLAQGDGTLRLF-----DTT--
DmPex7p 53 SSSTDGQSLGELCRLEWS DGLFDVAWCPYAADIAATASGDGSLQIWCGLDGESASNQL--

HsPex7p 99 KAAGPLQVYKEHAQEVYSVDWSQTRGEQLVWVSGSWDQTVKLDWPTVVGKSLCTFR-----
DrPex7p 91 NPQGLLQVLKGHTEQEVYSVDWSQTRAENLLVSGSWDHTAKVWDPVQCQLVNSLQ-----
AtPex7p 94 PPSNPTRSFQEHAREVQSVQDYNPTRRDSFLTS-SWDDTVKLVAMDRPASVRTFK-----
ScPex7p 92 FKEFPVIAIFKEHEREVFS CNWNLVNRQNF LSS-SWDGSIKIWSPLRKQSLM LTPRPLEI
DmPex7p 111 TPKQPLICLQEHKNEVYSLDWGEKWNHYHTLLSGSWDCTLKLVDCNRQNSITTFV-----

HsPex7p 153 -----GHESIIYSTIWSPHIPGCFASASGDQTLRIWDVK--AAG
DrPex7p 145 -----GHEGVIYSTIWSPHIPACFASASGDGTLRVWDVK--AGS
AtPex7p 147 -----EHAYCVYQAVWNPKHGDV FASASGDCTLR IWDV R--EPG
ScPex7p 151 TKMVDPLNAIILKKSFTGISKNRNCVYQAQFSPHDQNLVLSCSGNSYASLFDIRLP SGK
DmPex7p 165 -----GHNDLIYGAKFSPLIANL FASVSTDGHLNLWNSLDFAGK

HsPex7p 190 VRIVIPAHQ-AEILSCDWCKYENLLVTGAVDCSLRGWDLRNVRQPVFEL-----
DrPex7p 182 CRLVIPAHK-SEILSCDWCKYDQNVIVTGAVDCSLRVWDLRNIRHPVAQM-----
AtPex7p 184 STMIIIPAHQ-FEILSCDWNKYDDCILATSSVDKTVKVDVRSYRVPLAVL-----
ScPex7p 211 NQNNFLVHSGLEALTCDFNKYRPYVAVATGGVDNAIRIWDIRMLNKNESATIKRTVPGQLH
DmPex7p 204 PLMSIEAHA-SEALCCDWSHFDRNVLVTGGSDGLIRGWDLRKMRTHV FEL-----

HsPex7p 239 -----LGHTYAIRRVKFS PFHASV LASCSYDFTVRFWNFSKPDSLLETVE-----
DrPex7p 231 -----SGHSYAIRRVKFC PFYKTVLASCSYDFTVRFWDYSKSQALLETLE-----
AtPex7p 233 -----NGHGYAVRKKV KFS PHRRSLIASCSYDMSVCLWDYMVEDALVGRYD-----
ScPex7p 271 NSSCINEIPNAHGLAIRKVTWSPHHSNILMSASYDMTCRIWRDLSNDGAKETYKTNSTDA
DmPex7p 253 -----YSGEFAVRRLACSPHSAAVLASANYDFTTRIWNLERGESAEVNA-----

HsPex7p 284 -----HHTFEFTCGLDFS LQ-SPTQVADCSWDET IKIYDPACLTIPA--
DrPex7p 276 -----HHSEFVCGLNFN LH-IPNQVDCSWDET VKV FSPSSLA AV---
AtPex7p 278 -----HHTFEFVGVIDMSVL-VEGLMASTGWDEL VYVWQQGMDPRAS--
ScPex7p 331 TKGSIFNFTQHSEFVFGADWSLWGKPGYVASTAWDGNLFVWNGLG-----
DmPex7p 298 -----RHTEFVCGLDWNPH-RTHQLADCGWDSL ANVYTPQCLSGDLVV
```

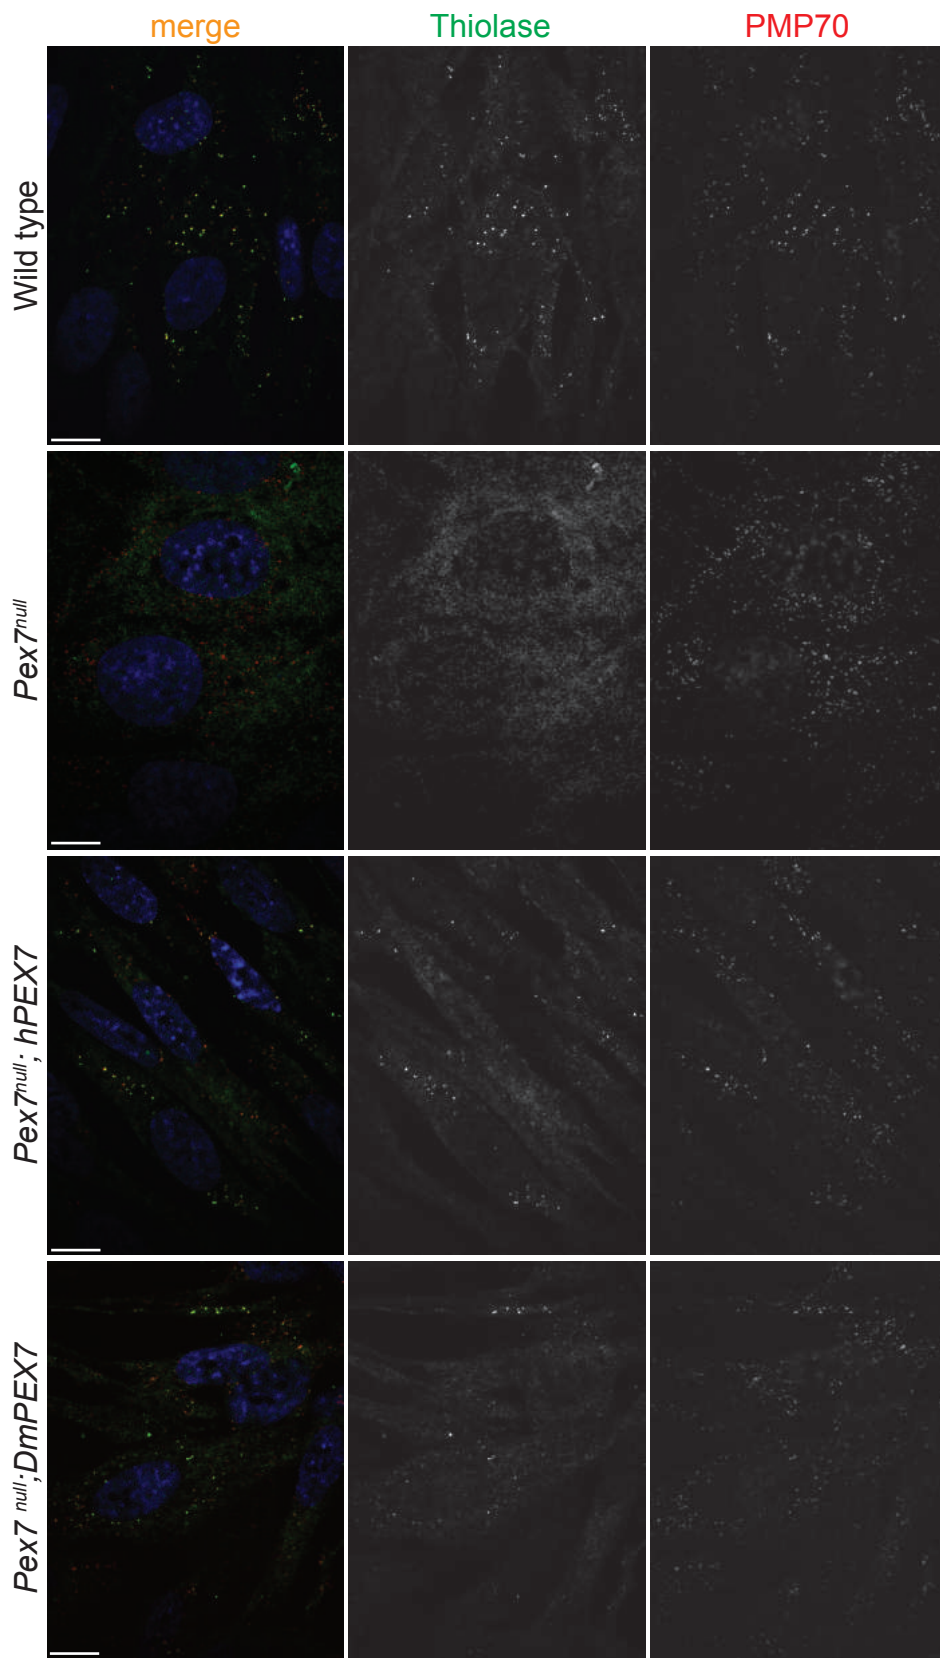

Source: http://biorxiv.org/content/10.1101/366633v1.full.pdf
